# Supplementary material for: Autophagy Signaling by Neural-Induced Human Adipose Tissue-Derived Stem Cell-Conditioned Medium during Rotenone-Induced Toxicity in SH-SY5Y Cells
Source: MDPI journal article supplement (doi:10.3390/ijms23084193), 2022-04-10
Supplement: s1 [file s1]

# Supplementary materials to

*Article*

## **Autophagy Signaling by Neural-induced Human Adipose Tissue-derived Stem Cell-conditioned Medium during Rotenone-induced Toxicity in SH-SY5Y Cells**

**Mahesh Ramalingam <sup>1,\*†</sup>, Han-Seong Jeong <sup>1,†</sup>, Jinsu Hwang <sup>1</sup>, Hyong-Ho Cho <sup>2</sup>, Byeong C. Kim <sup>3</sup>, Eungpil Kim <sup>4</sup> and Sujeong Jang <sup>1,\*</sup>**

<sup>1</sup> Department of Physiology, Chonnam National University Medical School, Hwasun, Jeollanam-do 58128, Korea; jhsjeong@hanmail.net (H-S.J.); wlstn0128@naver.com (J.H.)

<sup>2</sup> Department of Otolaryngology-Head and Neck Surgery, Chonnam National University Hospital, Chonnam National University Medical School, Gwangju 61469, Korea; victocho@jnu.ac.kr

<sup>3</sup> Department of Neurology, Chonnam National University Hospital, Chonnam National University Medical School, Gwangju 61469, Korea; byeong.kim7@gmail.com

<sup>4</sup> Jeonnam Biopharmaceutical Research Center, Hwasun, Jeollanam-do 58141, Korea; keungpil@gmail.com

\* Correspondence: ramalingamahesh@jnu.ac.kr (M.R.); sujeong.jjang@gmail.com (S.J.)

† These authors contributed equally to this work.

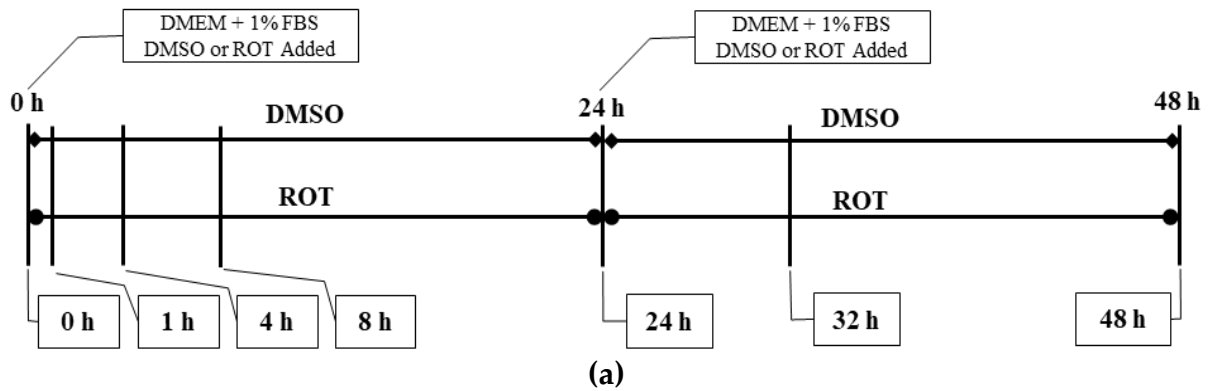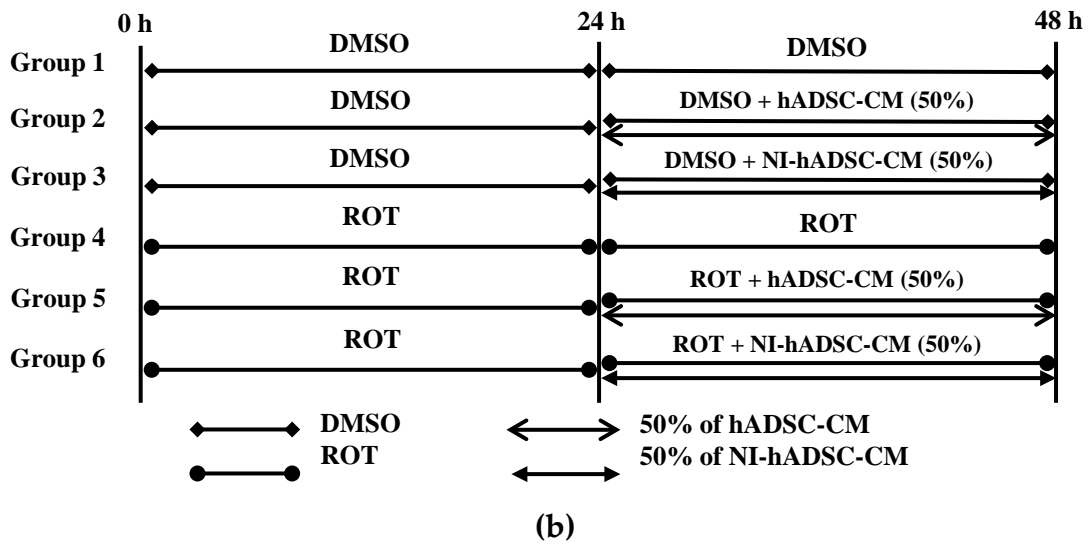

**Supplementary Figure S1.** (a) The experimental study plan for time course ROT toxicity. SH-SY5Y cells were seeded at a density of 50,000 cells/mL of DMEM containing 1% FBS and used for experiments after overnight incubation. Cells incubated in the absence or presence of ROT (0.5  $\mu$ M) up to 48 h. Each time point, floating cells in medium were combined with adherent cells harvested by scraping, pelleted, and washed twice with PBS. Then, cells were used to prepare cell lysates. (b) To test the therapeutic effects of NI-hADSC-CM, SH-SY5Y cells were first treated with or without ROT for 24 h. The culture medium were removed, floating cells were pelleted from the medium, resuspend the cell pellet in the fresh medium, and added to respective wells. Then, cells were treated with or without hADSC-CM or NI-hADSC-CM at 50% dilution in DMEM supplemented with 1% FBS and incubated in the absence or presence of ROT (0.5  $\mu$ M) for another 24 h. Floating cells in medium were combined with adherent cells harvested by scraping, pelleted, and washed twice with PBS. Then, cells were used to prepare cell lysates. Different passages of SH-SY5Y cells treated with different batches of hADSC-CM or NI-hADSC-CM for three independent experiments.

**Supplementary Table S1.** Western blotting conditions and antibodies used in this study.

**Western blotting conditions:**

**SDS-PAGE Gel Percentages**

- 6% = p-mTORC1, p-mTORC2, t-mTOR, p-ULK1, t-ULK1, ATG13, Beclin-1, p62, LAMP1, LAMP2, and TFEB
- 8% = p-AMPK and t-AMPK
- 9% = DEPTOR, p-Akt, t-Akt, p-GSK3β, t-GSK3, p-ERK, t-ERK, ATG5, ATG7, and ATG12
- 11% = LC3B, ATG3

**SDS-PAGE Gel Running:**

80~100 V for 100~120 min

**SDS-PAGE Gel Transfer Times to PVDF Membrane:**

- 6% = 250 mA for 90 min
- 8 & 9% = 220 mA for 90 min
- 11% = 200 mA for 60 min

| Antibody Name                        | Host, MW Details        | Company        | Cat. No.  | Dilution |
|--------------------------------------|-------------------------|----------------|-----------|----------|
| <b>Primary Antibodies:</b>           |                         |                |           |          |
| p-mTORC1 (Ser2448)                   | Mouse mAb, 220 kDa      | Santa Cruz     | sc-293133 | 1:500    |
| p-mTORC2 (Ser2481)                   | Mouse mAb, 220 kDa      | Santa Cruz     | sc-293132 | 1:300    |
| t-mTOR                               | Mouse mAb, 211~245 kDa  | Santa Cruz     | sc-517464 | 1:1,000  |
| DEPTOR                               | Rabbit mAb, 48 kDa      | Cell Signaling | #11816    | 1:1,000  |
| p-AMPK (Thr172)                      | Rabbit mAb, 62 kDa      | Cell Signaling | #2535     | 1:1,000  |
| t-AMPK                               | Rabbit pAb, 62 kDa      | Cell Signaling | #2532     | 1:1,000  |
| p-ULK1 (Ser757)                      | Rabbit pAb, 140~150 kDa | Cell Signaling | #6888     | 1:1,000  |
| t-ULK1                               | Rabbit mAb, 150 kDa     | Cell Signaling | #8054     | 1:1,000  |
| ATG13                                | Rabbit mAb, 72 kDa      | Cell Signaling | #13273    | 1:1,000  |
| p-Akt (Ser473)                       | Rabbit pAb, 60 kDa      | Cell Signaling | #9271     | 1:1,000  |
| t-Akt                                | Rabbit pAb, 60 kDa      | Cell Signaling | #9272     | 1:2,000  |
| p-GSK3β (Ser9)                       | Rabbit pAb, 46 kDa      | Cell Signaling | #9336     | 1:1,000  |
| t-GSK3                               | Rabbit mAb, 46 kDa      | Cell Signaling | #9315     | 1:1,000  |
| p-ERK1/2                             | Rabbit mAb, 44, 42 kDa  | Cell Signaling | #4370     | 1:1,000  |
| t-ERK1/2                             | Rabbit mAb, 44, 42 kDa  | Cell Signaling | #4695     | 1:2,000  |
| Beclin-1                             | Rabbit mAb, 60 kDa      | Cell Signaling | #3495     | 1:1,000  |
| LC3B                                 | Rabbit mAb, 16,14 kDa   | Cell Signaling | #3868     | 1:1,000  |
| SQSTM1 = p62                         | Rabbit mAb, 62 kDa      | Cell Signaling | #39749    | 1:1,000  |
| ATG3                                 | Mouse mAb, 42 kDa       | Santa Cruz     | sc-393660 | 1:500    |
| ATG5                                 | Mouse mAb, 32, 50 kDa   | Santa Cruz     | sc-133158 | 1:500    |
| ATG7                                 | Mouse mAb, 71 kDa       | Santa Cruz     | sc-376212 | 1:500    |
| ATG12                                | Mouse mAb, 21, 60 kDa   | Santa Cruz     | sc-271688 | 1:500    |
| LAMP1                                | Mouse mAb, 120 kDa      | Santa Cruz     | sc-20011  | 1:500    |
| LAMP2                                | Rat mAb, 120 kDa        | Santa Cruz     | sc-20004  | 1:500    |
| TFEB                                 | Goat pAb, 53 kDa        | Abcam          | ab2636    | 1:1,000  |
| GAPDH                                | Rabbit mAb, 37 kDa      | Cell Signaling | #2118     | 1:3,000  |
| GAPDH (HRP conjugate)                | Rabbit mAb, 37 kDa      | Cell Signaling | #8884     | 1:3,000  |
| β-actin (HRP conjugate)              | Rabbit mAb, 45 kDa      | Cell Signaling | #5125     | 1:3,000  |
| <b>Secondary Antibodies:</b>         |                         |                |           |          |
| Anti-rabbit IgG, HRP-linked antibody |                         | Cell Signaling | #7074     | 1:1,000  |
| Anti-mouse IgG, HRP-linked antibody  |                         | Cell Signaling | #7076     | 1:1,000  |
| Anti-rat IgG, HRP-linked antibody    |                         | Cell Signaling | #7077     | 1:1,000  |
| Anti-goat IgG-HRP                    |                         | Santa Cruz     | sc-2354   | 1:1,000  |

p-, phosphorylated; t-, total.  
pAb, polyclonal antibody; mAb, monoclonal antibody; kDa, kiloDalton.

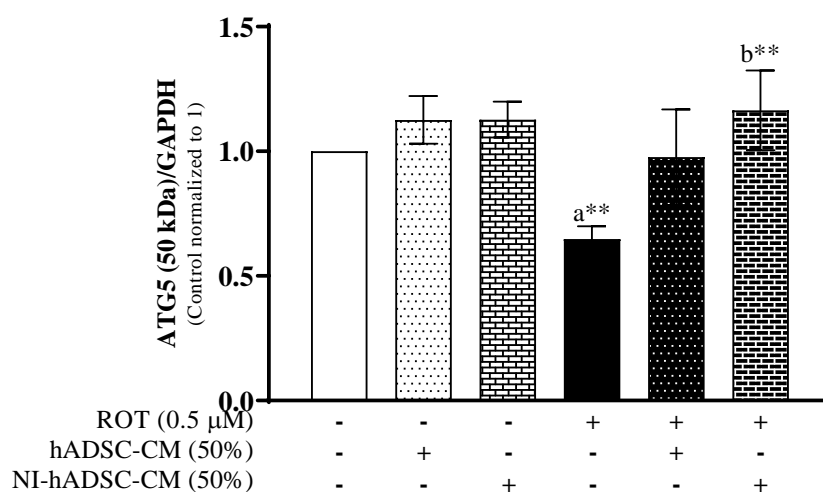

(a)

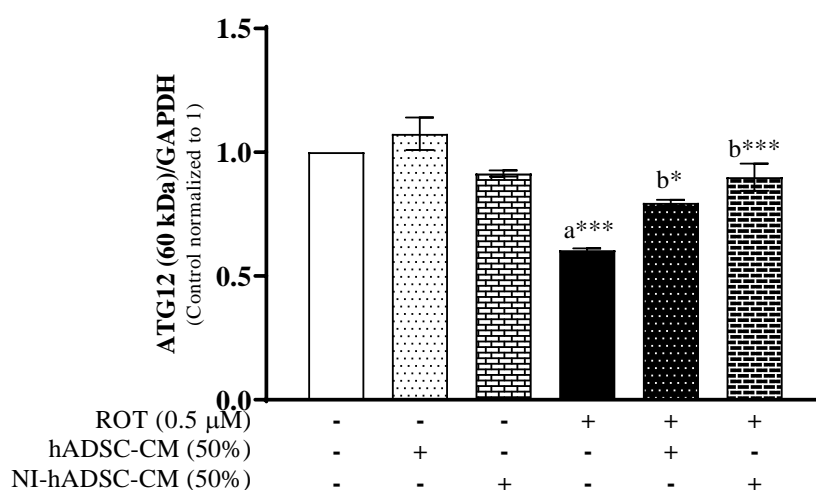

(b)

**Supplementary Figure S2.** SH-SY5Y cells were seeded as 50,000 cells/mL of DMEM containing 1% FBS and used for experiments after overnight incubation. Cells with absence or presence of ROT (0.5  $\mu$ M) for 48 h were treated with hADSC-CM (50%) or NI-hADSC-CM (50%) during the last 24 h and analyzed by Western blotting. The bar graphs represents for ATG5-ATG12/GAPDH ratio (a) and ATG12-ATG5/GAPDH ratio (b). Data are mean  $\pm$  SEM of three independent experiments and analyzed by one-way of variance (ANOVA) followed by Tukey's *post hoc* test. Statistical significance: a-compared with control; b-compared with ROT; \*  $p < 0.05$ , \*\*  $p < 0.01$  and \*\*\*  $p < 0.001$ .

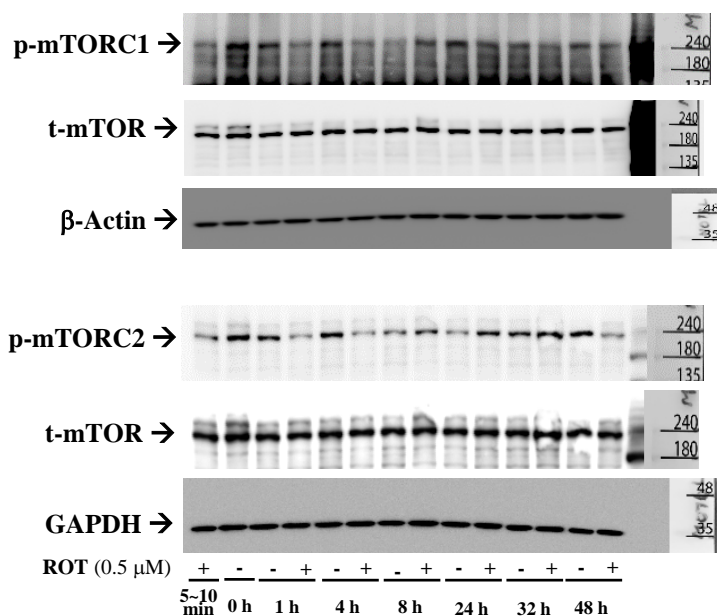

(a)

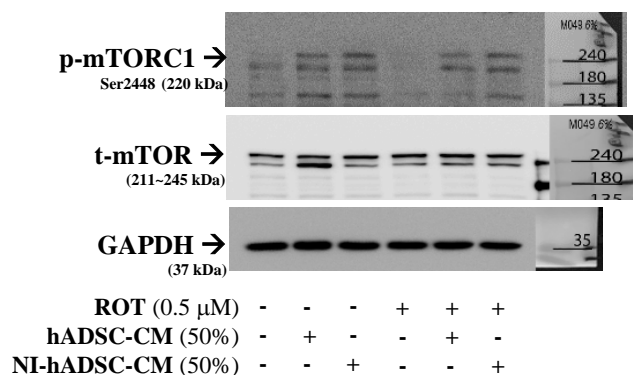

(b)

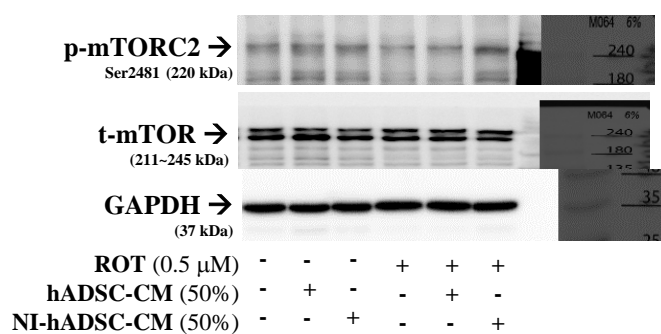

(c)

**Supplementary Figure S3.** Unedited images and their molecular weight markers for respective Western blots used in **Figure 2** of this manuscript.

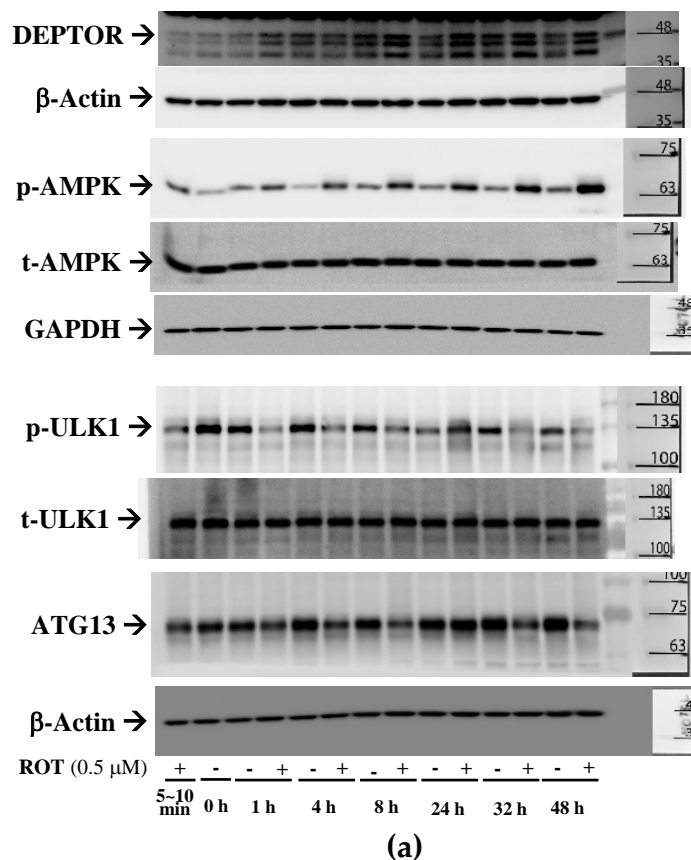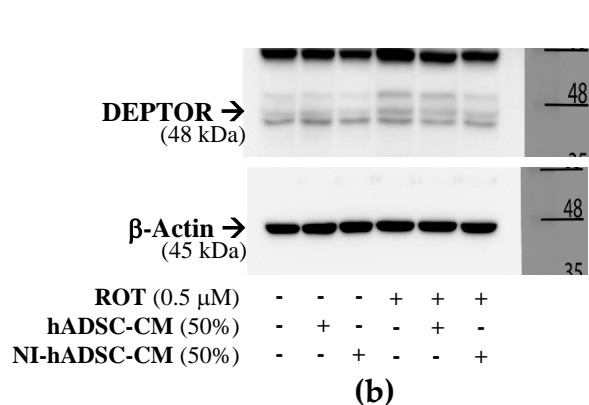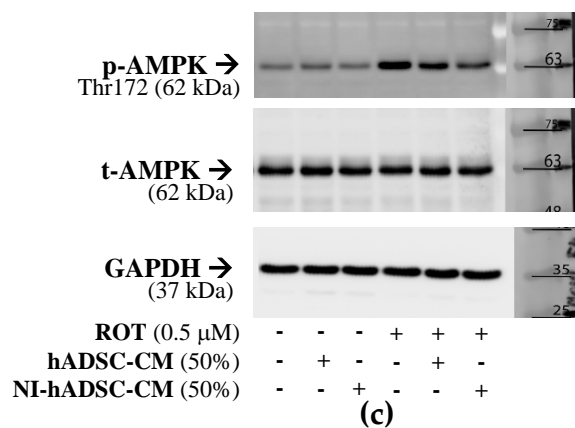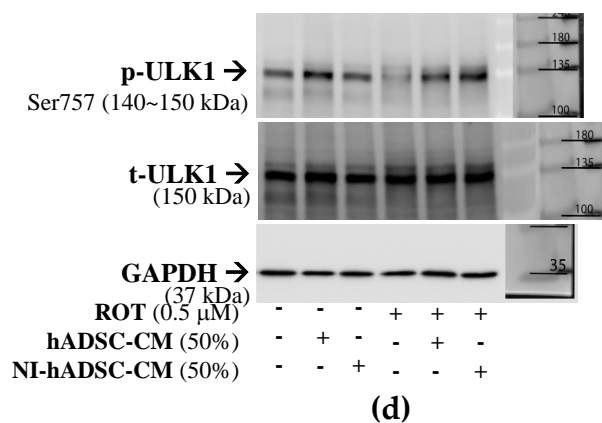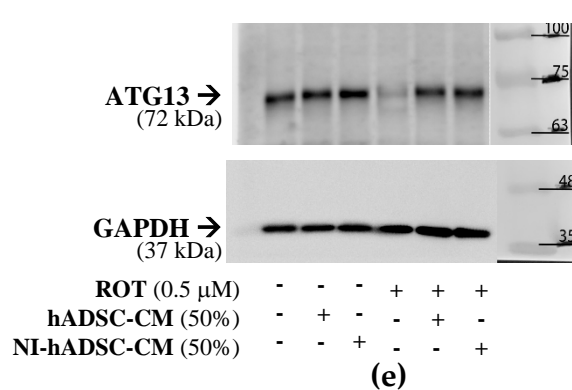

**Supplementary Figure S4.** Unedited images and their molecular weight markers for respective Western blots used in Figure 3 of this manuscript.

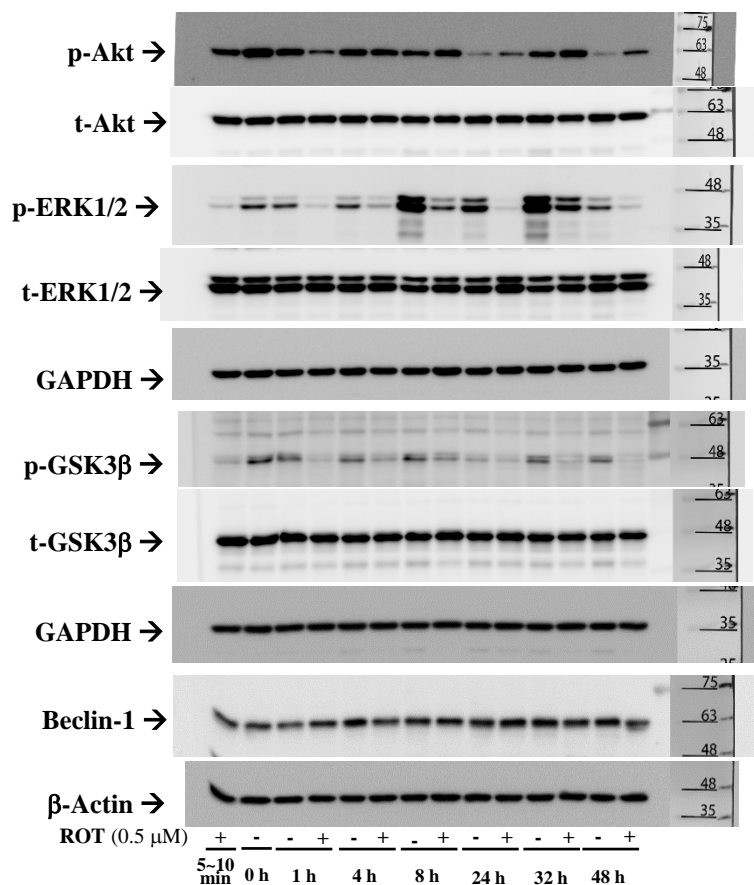

(a)

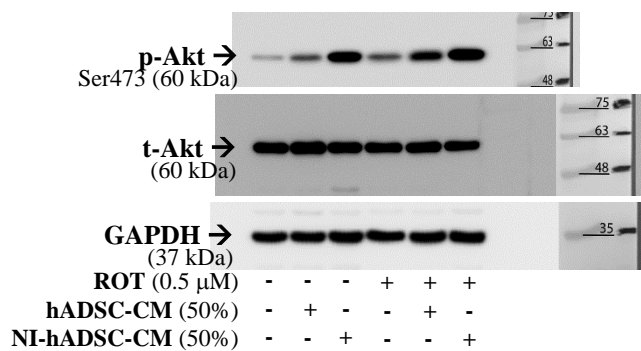

(b)

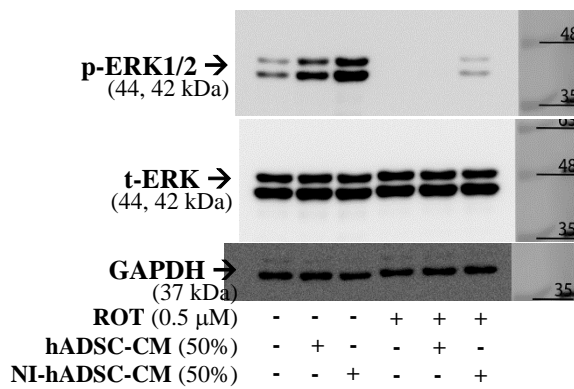

(c)

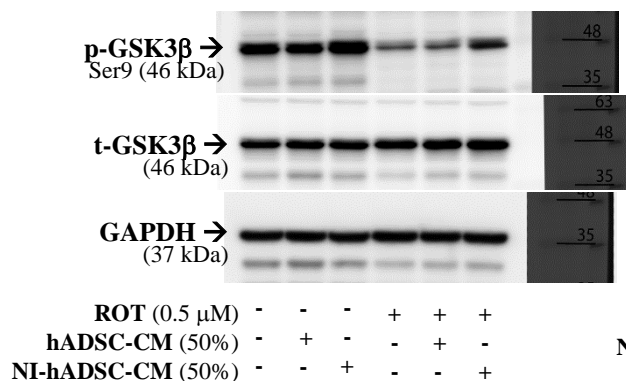

(d)

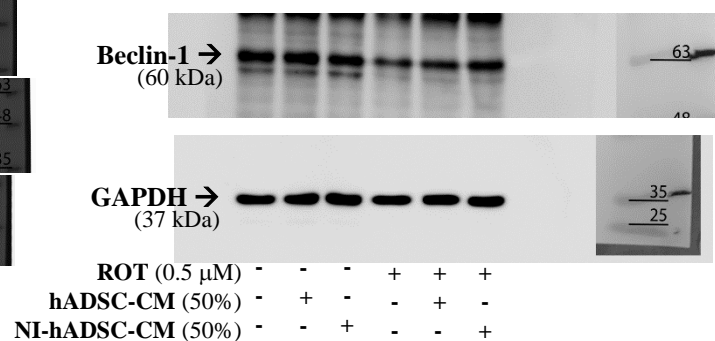

(e)

**Supplementary Figure S5.** Unedited images and their molecular weight markers for respective Western blots used in **Figure 4** of this manuscript.

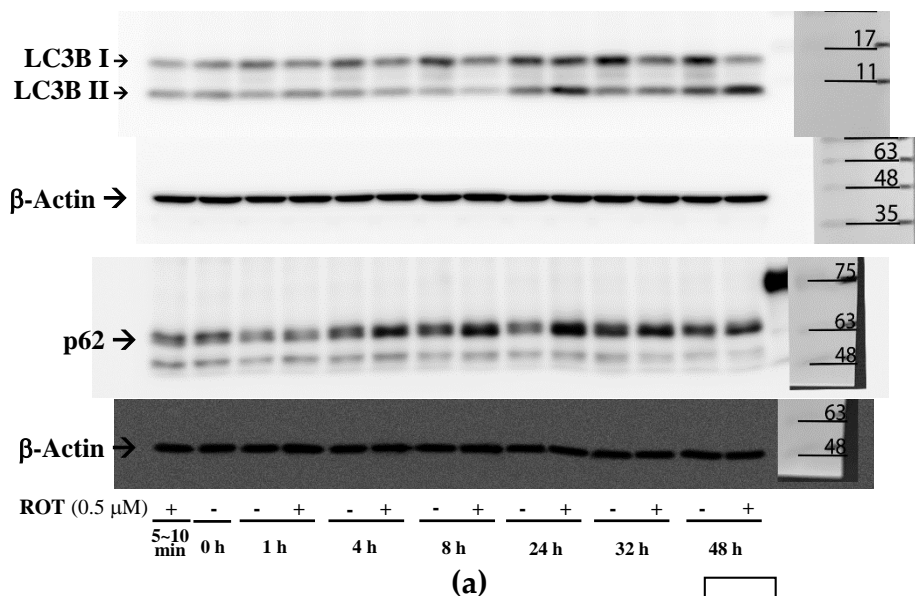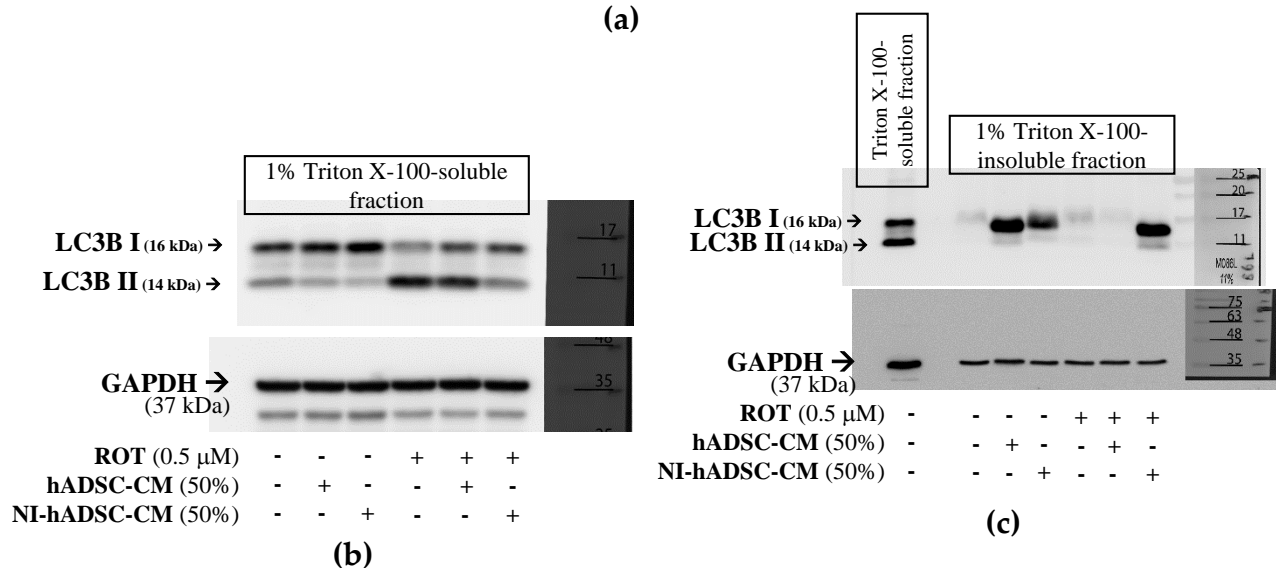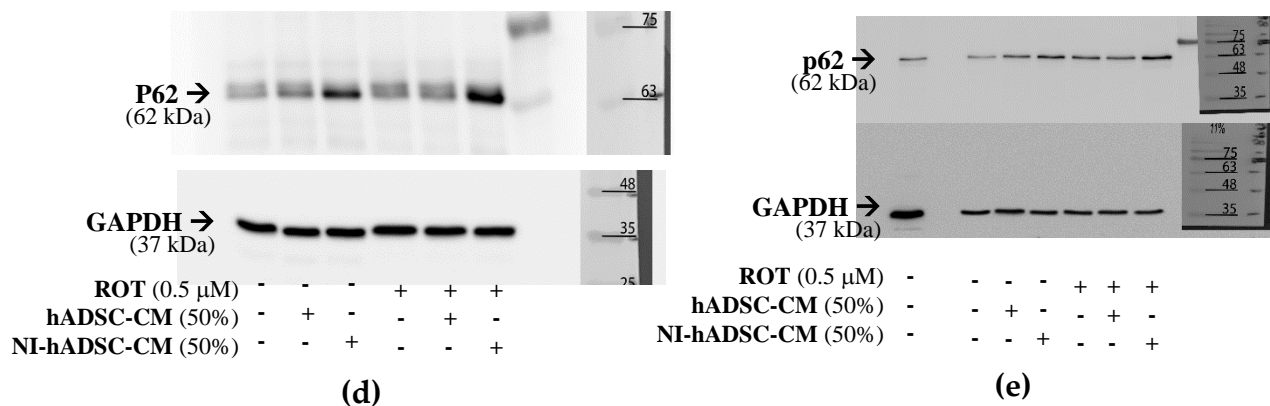

**Supplementary Figure S6.** Unedited images and their molecular weight markers for respective Western blots used in **Figure 5** of this manuscript.



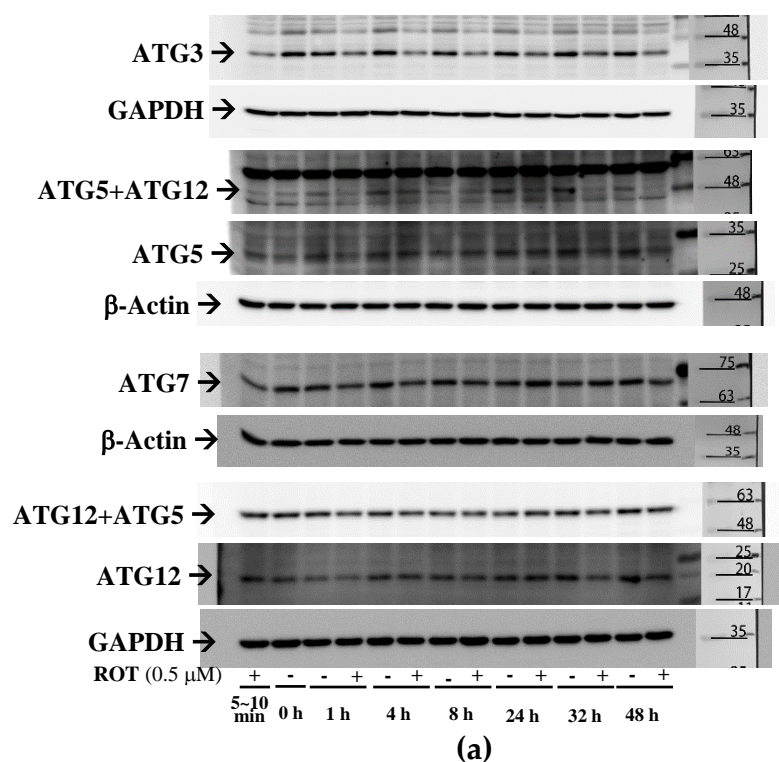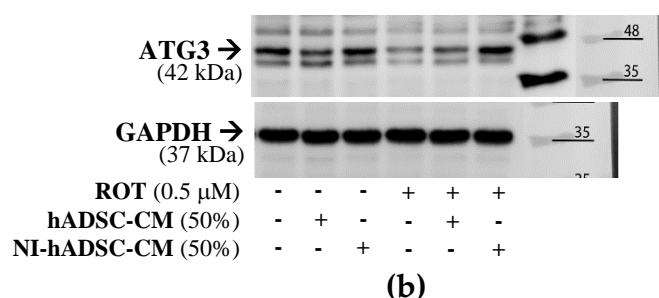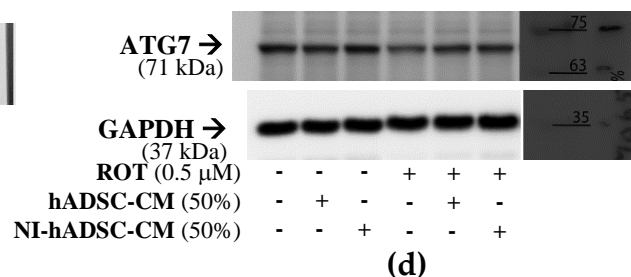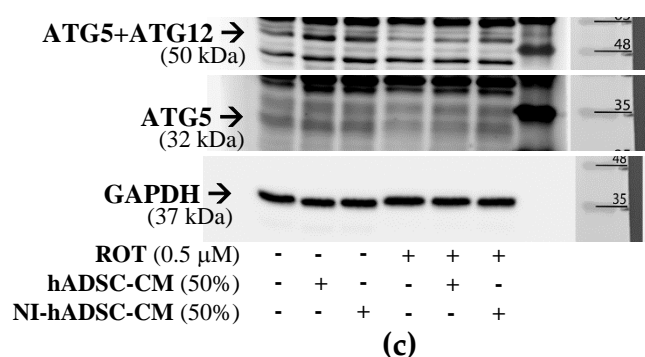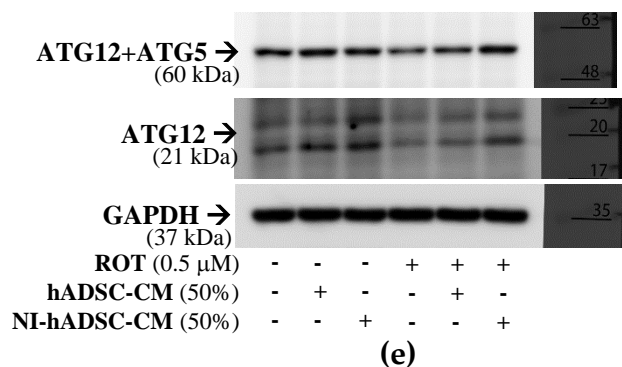

**Supplementary Figure S7.** Unedited images and their molecular weight markers for respective Western blots used in **Figure 6** of this manuscript.

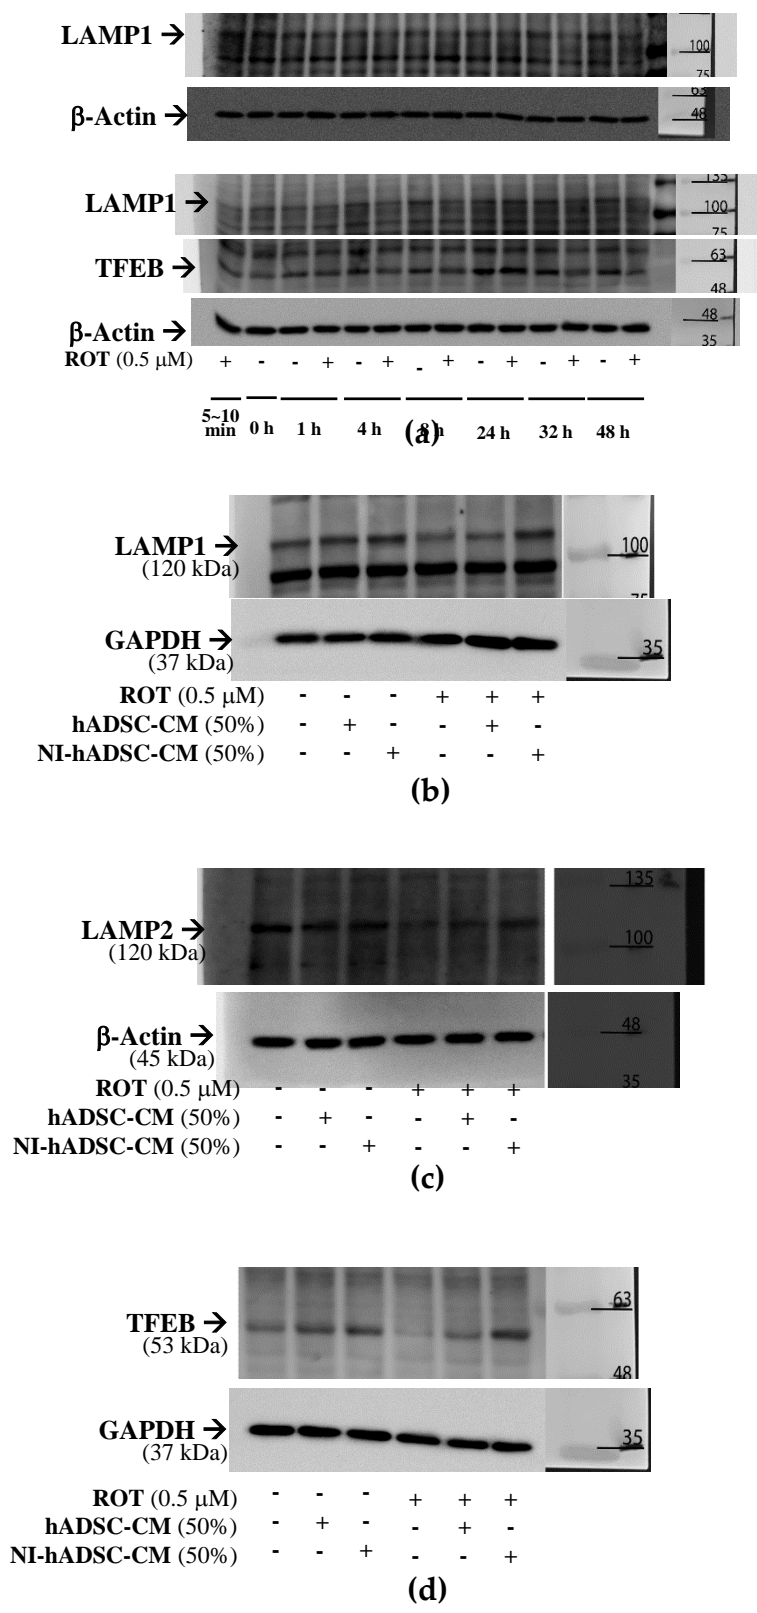

**Supplementary Figure S8.** Unedited images and their molecular weight markers for respective Western blots used in **Figure 7** of this manuscript.

| Each antibody is spotted<br>in duplicate vertically |   | A    | B       | C             | D     | E     | F     | G        | H      |
|-----------------------------------------------------|---|------|---------|---------------|-------|-------|-------|----------|--------|
|                                                     | 1 | POS  | POS     | NEG           | NEG   | ATG3  | ATG4A | ATG4B    | ATG5   |
|                                                     | 2 |      |         |               |       |       |       |          |        |
|                                                     | 3 | NEG  | NEG     | ATG7          | ATG10 | ATG12 | ATG13 | Beclin-1 | BNIP3L |
|                                                     | 4 |      |         |               |       |       |       |          |        |
|                                                     | 5 | DDR2 | GABARAP | LAMP1         | LC3A  | LC3B  | NBS1  | p62      | NEG    |
|                                                     | 6 |      |         |               |       |       |       |          |        |
|                                                     | 7 | Rheb | MSK1    | $\alpha$ -syn | NEG   | NEG   | NEG   | NEG      | POS    |
|                                                     | 8 |      |         |               |       |       |       |          |        |

(a)

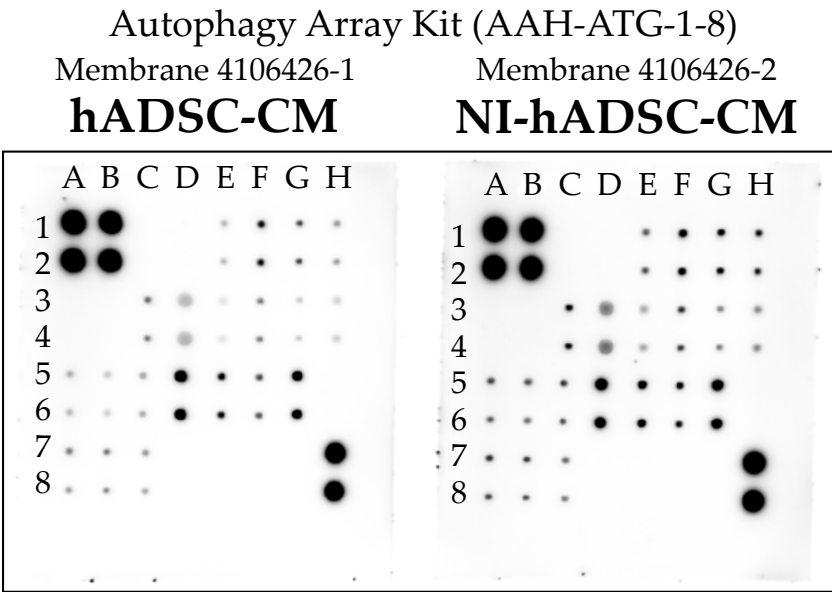

(b)

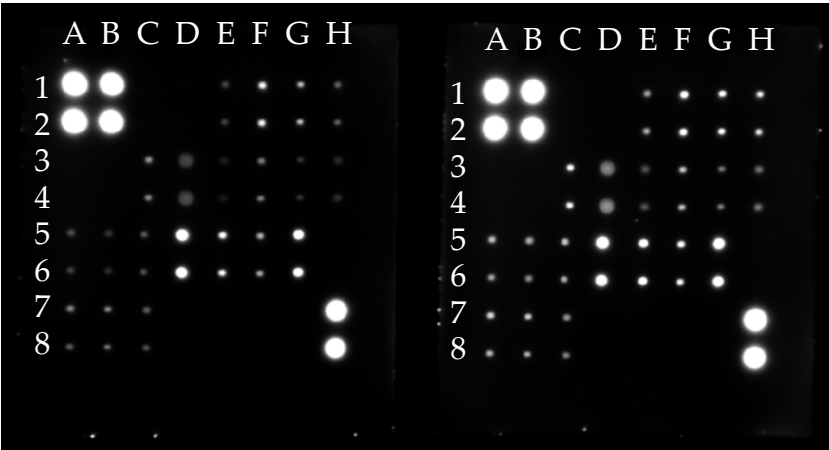

(c)

**Supplementary Figure S9.** (a) The human autophagy array (Raybiotech, AAH-ATG-1-8) profiles 20 autophagy related proteins spotted in duplicate, positive controls (POS), and negative controls (NEG). (b) Unedited image of autophagy array assay membranes for hADSC-CM and NI-hADSC-CM used in **Figure 8** of this manuscript. (c) Inverted image of (b) used for quantification in ImageJ software with ‘Microarray Profile’ plugins.

**Supplementary Table S2.** Quantification of the 20 proteins spotted on autophagy array membranes.

| Analyte # | Coordinate | Analyte Name   | Membrane 4106426-1,<br>Sample: hADSC-CM |             | Membrane 4106426-2,<br>Sample: NI-hADSC-CM |             | % Change of hADSC-CM<br>vs. NI-hADSC-CM |             |         | >5 = Secreted<br>>20 = Expressed | P Value<br>Summary |
|-----------|------------|----------------|-----------------------------------------|-------------|--------------------------------------------|-------------|-----------------------------------------|-------------|---------|----------------------------------|--------------------|
|           |            |                | Replicate 1                             | Replicate 2 | Replicate 1                                | Replicate 2 | Replicate 1                             | Replicate 2 | Mean    |                                  |                    |
| N/A       | 1A, 2A     | Positive Spots | 64499.267                               | 64503.903   | 64286.973                                  | 63551.897   | -0.329                                  | -1.476      | -0.903  | Positive Spots                   | N/A                |
| N/A       | 1B, 2B     | Positive Spots | 62331.231                               | 62614.114   | 63312.835                                  | 62493.567   | 1.575                                   | -0.193      | 0.691   | Positive Spots                   | N/A                |
| 1         | 1E, 2E     | ATG3           | 2189.204                                | 1761.440    | 4825.254                                   | 4617.007    | 120.411                                 | 162.115     | 141.263 | Increased                        | NS                 |
| 2         | 1F, 2F     | ATG4A          | 7804.690                                | 6959.292    | 10436.524                                  | 9086.105    | 33.721                                  | 30.561      | 32.141  | Increased                        | NS                 |
| 3         | 1G, 2G     | ATG4B          | 4201.395                                | 3902.102    | 8135.753                                   | 7091.378    | 93.644                                  | 81.732      | 87.688  | Increased                        | *                  |
| 4         | 1H, 2H     | ATG5           | 2854.723                                | 2285.914    | 7194.363                                   | 6444.486    | 152.016                                 | 181.922     | 166.969 | Increased                        | **                 |
| 5         | 3C, 4C     | ATG7           | 4389.781                                | 3507.000    | 8121.777                                   | 7400.483    | 85.016                                  | 111.020     | 98.018  | Increased                        | **                 |
| 6         | 3D, 4D     | ATG10          | 6433.133                                | 7420.976    | 12393.554                                  | 14002.530   | 92.652                                  | 88.689      | 90.670  | Increased                        | ***                |
| 7         | 3E, 4E     | ATG12          | 1095.213                                | 979.457     | 3078.256                                   | 3108.571    | 181.065                                 | 217.377     | 199.221 | Increased                        | NS                 |
| 8         | 3F, 4F     | ATG13          | 3037.292                                | 2838.953    | 5397.214                                   | 4767.254    | 77.698                                  | 67.923      | 72.811  | Increased                        | NS                 |
| 9         | 3G, 4G     | Beclin-1       | 1094.736                                | 1006.652    | 2919.784                                   | 2919.205    | 166.711                                 | 189.991     | 178.351 | Increased                        | NS                 |
| 10        | 3H, 4H     | BNIP3L         | 1501.811                                | 1626.546    | 4525.023                                   | 4758.469    | 201.304                                 | 192.551     | 196.927 | Increased                        | *                  |
| 11        | 5A, 6A     | DDR2           | 3495.354                                | 2714.383    | 6924.148                                   | 5130.357    | 98.096                                  | 89.006      | 93.551  | Increased                        | NS                 |
| 12        | 5B, 6B     | GABARAP        | 1908.254                                | 1435.079    | 6009.652                                   | 3917.148    | 214.929                                 | 172.957     | 193.943 | Increased                        | *                  |
| 13        | 5C, 6C     | LAMP1          | 2574.797                                | 2085.031    | 5870.840                                   | 4238.838    | 128.012                                 | 103.299     | 115.655 | Increased                        | NS                 |
| 14        | 5D, 6D     | LC3A           | 22880.020                               | 19838.790   | 25268.015                                  | 20985.037   | 10.437                                  | 5.778       | 8.107   | Secreted                         | NS                 |
| 15        | 5E, 6E     | LC3B           | 8135.021                                | 6809.913    | 12991.765                                  | 11633.998   | 59.702                                  | 70.839      | 65.270  | Increased                        | ***                |
| 16        | 5F, 6F     | NBS1           | 4464.084                                | 3793.830    | 8053.124                                   | 6620.057    | 80.398                                  | 74.495      | 77.447  | Increased                        | *                  |
| 17        | 5G, 6G     | p62            | 16017.823                               | 14392.930   | 21628.726                                  | 19132.166   | 35.029                                  | 32.928      | 33.978  | Increased                        | ***                |
| 18        | 7A, 7B     | Rheb           | 4039.316                                | 2332.128    | 6552.392                                   | 5237.571    | 62.215                                  | 124.583     | 93.399  | Increased                        | NS                 |
| 19        | 7B, 8B     | MSK1           | 3168.930                                | 2332.900    | 5174.946                                   | 3925.892    | 63.303                                  | 68.284      | 65.793  | Increased                        | NS                 |
| 20        | 7C, 7D     | $\alpha$ -syn  | 2443.264                                | 1797.604    | 3733.128                                   | 3002.337    | 52.793                                  | 67.019      | 59.906  | Increased                        | NS                 |

ATG, autophagy-related; BNIP3L, Bcl-2 interacting protein 3 like; DDR2, discoidin domain receptor tyrosine kinase 2; GABARAP, gamma-aminobutyric acid receptor-associated protein; LAMP1, lysosomal associated membrane protein 1; LC3A, microtubule associated protein 1 light chain 3 alpha; LC3B, microtubule associated protein 1 light chain 3 beta; NBS1, nibrin; p62, sequestosome 1; Rheb, Ras homology enriched in brain; MSK1, mitogen-and stress-activated protein kinase 1;  $\alpha$ -syn, alpha-synuclein. Data collected by using ImageJ software with 'Microarray Profile' plugins. Mean (%) values above 5% were classified as secreted, above 20% were considered abundantly expressed, and below 5% were ignored. Statistical analysis was performed using two-way analysis of variance. Statistical significance: NI-hADSC-CM compared with hADSC-CM as control; \*  $p < 0.05$ , \*\*  $p < 0.01$ , \*\*\*  $p < 0.001$  and <sup>NS</sup>-non-significant.
